# Supplementary material for: Prevalence of Sexual Initiation Before Age 13 Years Among Male Adolescents and Young Adults in the United States
Source: PubMed Central journal article supplement (PMC6547075; doi:10.1001/jamapediatrics.2019.0458), 2019-04-08

## Supplementary Online Content

Lindberg LD, Maddow-Zimet I, Marcell AV. Prevalence of sexual initiation before age 13 years among male adolescents and young adults in the United States. *JAMA Pediatr*. Published online April 8, 2019. doi:10.1001/jamapediatrics.2019.0458

**eTable 1.** Percent of Male Students Reporting Their First Sexual Intercourse Before Age 13 Years, 2011, 2013 and 2015 YRBS; Percent of Young Men Aged 15-24 Reporting Their First Sexual Intercourse Before Age 13 Years, 2006-2010 and 2011-2015 NSFG

**eTable 2.** Predicted Proportion of Male Middle School Students Reporting Their First Sexual Intercourse Before Age 13 Years, by Race/Ethnicity and Location

**eTable 3.** Full Multivariable Logistic Regression Model of the Association Between First Sexual Intercourse Before Age 13 Years and Various Demographic Characteristics, Used to Produce Predicted Probabilities in Table 4

**eTable 4.** Relationship with First Sexual Partner, Among Men Aged 15-24 Reporting Their First Sexual Intercourse Before Age 13 Years, Pooled 2006-2010 and 2011-2015 NSFG

**eTable 5.** Sensitivity Analyses of Percent of Males Aged 15-24 Reporting Their First Sexual Intercourse Before Age 13 Years, Pooled 2006-10 and 2011-15 NSFG; According to Race/Ethnicity and Sensitivity Specification

**eFigure.** Kaplan-Meier Failure Curve of Age at First Sex Among Male 15-24 Year Olds, Pooled NSFG 2006-10 and 2011-15, and Male Students, Pooled YRBS 2011-2015

This supplementary material has been provided by the authors to give readers additional information about their work.

**eTable 1.** Percent of Male Students Reporting Their First Sexual Intercourse Before Age 13 Years, 2011, 2013 and 2015 YRBS; Percent of Young Men Aged 15-24 Reporting Their First Sexual Intercourse Before Age 13 Years, 2006-2010 and 2011-2015 NSFG

| Survey year | %  | 95% CI   |
|-------------|----|----------|
| <b>YRBS</b> |    |          |
| 2011        | 9% | (8%-10%) |
| 2013        | 8% | (7%-10%) |
| 2015        | 6% | (4%-7%)  |
| <b>NSFG</b> |    |          |
| 2006-2010   | 3% | (3%-4%)  |
| 2011-2015   | 4% | (3%-5%)  |

**eTable 2.** Predicted Proportion of Male Middle School Students Reporting Their First Sexual Intercourse Before Age 13 Years, by Race/Ethnicity and Location<sup>a</sup>

| <b>Location</b>    | <i>Total unweighted sample size</i> | <i>Total (95% CI)</i> | <i>Non-Hispanic black (95% CI)</i> | <i>Non-Hispanic white (95% CI)</i> | <i>p-value</i> | <i>Hispanic (95% CI)</i> | <i>p-value</i> | <i>Non-Hispanic other (95% CI)</i> | <i>p-value</i> |
|--------------------|-------------------------------------|-----------------------|------------------------------------|------------------------------------|----------------|--------------------------|----------------|------------------------------------|----------------|
| Memphis, TN        | 1,098                               | 29% (19%-38%)         | 32% (21%-43%)                      | <i>na</i>                          |                | 12% (4%-20%)             | 0.002          | <i>na</i>                          |                |
| Milwaukee, WI      | 1,744                               | 27% (18%-36%)         | 40% (25%-55%)                      | 7% (3%-12%)                        | <.001          | 11% (6%-16%)             | <.001          | 18% (9%-27%)                       | <.001          |
| Duval County, FL   | 5,639                               | 17% (12%-23%)         | 27% (18%-36%)                      | 9% (6%-12%)                        | <.001          | 20% (13%-27%)            | 0.008          | 16% (10%-22%)                      | <.001          |
| Chicago, IL        | 1,144                               | 15% (10%-20%)         | 27% (17%-37%)                      | <i>na</i>                          |                | 8% (4%-11%)              | <.001          | <i>na</i>                          |                |
| Palm Beach, FL     | 2,407                               | 12% (9%-16%)          | 26% (17%-35%)                      | 4% (2%-6%)                         | <.001          | 13% (8%-18%)             | <.001          | 10% (5%-16%)                       | <.001          |
| Broward County, FL | 1,226                               | 12% (10%-14%)         | 20% (17%-23%)                      | 5% (2%-8%)                         | <.001          | 10% (5%-15%)             | 0.004          | 14% (6%-22%)                       | 0.19           |
| Orange County, FL  | 2,218                               | 11% (8%-14%)          | 24% (15%-32%)                      | 4% (2%-6%)                         | <.001          | 10% (6%-14%)             | <.001          | 9% (3%-15%)                        | 0.002          |
| San Francisco, CA  | 2,972                               | 6% (4%- 9%)           | 30% (17%-44%)                      | 6% (2%-9%)                         | <.001          | 10% (6%-14%)             | <.001          | 2% (1%-3%)                         | <.001          |

*Note: Proportions are predicted cumulative hazards from hazard model controlling for grade and survey year. All race specific cumulative hazards predicted from models with race X site interaction terms included as covariates. All significance tests use non-Hispanic black as a reference group.*

<sup>a</sup> In order to be included in the sample, sites needed to have data available for at least two of the three survey years.

**eTable 3.** Full Multivariable Logistic Regression Model of the Association Between First Sexual Intercourse Before Age 13 Years and Various Demographic Characteristics, Used to Produce Predicted Probabilities in eTable 2

|                                                             | OR   | 95% CI      | p-value |
|-------------------------------------------------------------|------|-------------|---------|
| <i>Race/ethnicity</i>                                       |      |             |         |
| Non-Hispanic black                                          | 1.00 |             |         |
| Non-Hispanic white                                          | 0.23 | (0.15-0.36) | <.001   |
| Hispanic                                                    | 0.28 | (0.18-0.42) | <.001   |
| Non-Hispanic other                                          | 0.16 | (0.06-0.43) | <.001   |
| <i>Mother's education</i>                                   |      |             |         |
| Less than college                                           | 1.00 |             |         |
| College or more                                             | 0.49 | (0.26-0.94) | 0.03    |
| <i>Community type</i>                                       |      |             |         |
| Urban                                                       | 0.89 | (0.53-1.49) | 0.65    |
| Suburban                                                    | 0.76 | (0.46-1.28) | 0.31    |
| Rural (ref)                                                 | 1.00 |             |         |
| <i>Survey year</i>                                          |      |             |         |
| 2006-2010 (ref)                                             | 1.00 |             |         |
| 2011-2015                                                   | 1.16 | (0.81-1.66) | 0.42    |
| Age of respondent at interview                              | 1.08 | (1.03-1.14) | <.001   |
| <i>Interaction of race/ethnicity and mother's education</i> |      |             |         |

|                                      |      |             |      |
|--------------------------------------|------|-------------|------|
| Non-Hispanic white X College or more | 0.32 | (0.1-1.05)  | 0.06 |
| Hispanic X College or more           | 0.98 | (0.34-2.82) | 0.97 |
| Non-Hispanic other X College or more | 0.69 | (0.12-4.05) | 0.68 |

**eTable 4.** Relationship with First Sexual Partner, Among Men Aged 15-24 Reporting Their First Sexual Intercourse Before Age 13 Years, Pooled 2006-2010 and 2011-2015 NSFG

| <b>Relationship type</b>          | <b>%</b> | <b>95% CI</b> |
|-----------------------------------|----------|---------------|
| Just friends                      | 54%      | (47%-60%)     |
| Going out                         | 28%      | (22%-35%)     |
| "Had just met her"/something else | 18%      | (14%-24%)     |

**eTable 5.** Sensitivity Analyses of Percent of Males Aged 15-24 Reporting Their First Sexual Intercourse Before Age 13 Years, Pooled 2006-10 and 2011-15 NSFG; According to Race/Ethnicity and Sensitivity Specification

| Race/ethnicity           | N <sup>a</sup> | ACASI reports of age at first sex |          |         | Aged 15-19 currently in school |    |         |         | Respondents with imputed age at first sex excluded |     |          |         |
|--------------------------|----------------|-----------------------------------|----------|---------|--------------------------------|----|---------|---------|----------------------------------------------------|-----|----------|---------|
|                          |                | %                                 | 95% CI   | p-value | N <sup>a</sup>                 | %  | 95% CI  | p-value | N <sup>a</sup>                                     | %   | 95% CI   | p-value |
| Total                    | 7,739          | 4%                                | (3%-4%)  |         | 3,696                          | 4% | (3%-4%) |         | 6,736                                              | 4%  | (3%-4%)  |         |
| Non-Hispanic black (ref) | 1,523          | 9%                                | (7%-12%) |         | 749                            | 7% | (5%-9%) |         | 1,239                                              | 11% | (8%-13%) |         |
| Non-Hispanic white       | 3,737          | 2%                                | (1%-2%)  | <.001   | 1,724                          | 1% | (1%-2%) | <.001   | 3,356                                              | 2%  | (1%-3%)  | <.001   |
| Hispanic                 | 1,972          | 3%                                | (1%-4%)  | <.001   | 964                            | 2% | (1%-3%) | <.001   | 1,677                                              | 3%  | (2%-5%)  | <.001   |
| Non-Hispanic other       | 507            | 1%                                | (0%-2%)  | <.001   | 259                            | 1% | (0%-3%) | 0.008   | 464                                                | 2%  | (0%-3%)  | <.001   |

<sup>a</sup>Total unweighted sample size

**eFigure 1. Kaplan-Meier failure curve of age at first sex among male 15-24 year olds, pooled NSFG 2006-10 and 2011-15, and male students, pooled YRBS 2011-2015**

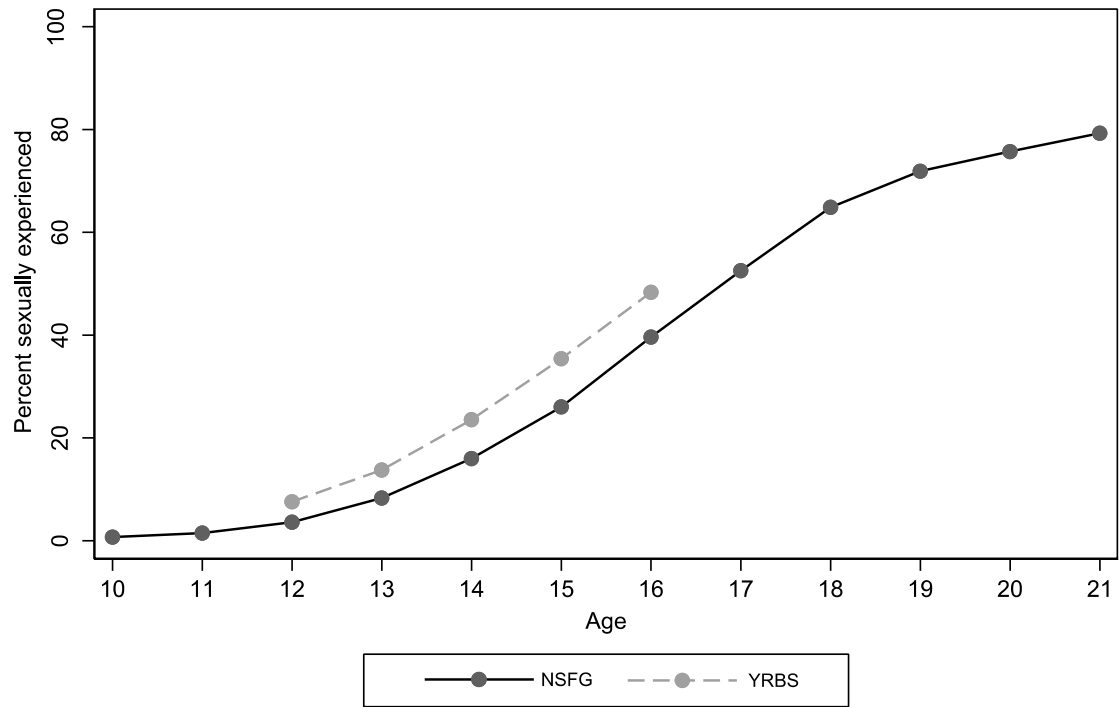

Supplement: jamapediatr-173-553-s001.pdf [file jamapediatr-173-553-s001.pdf]
